# Supplementary material
Source: PubMed Central journal article supplement (PMC4118591)

Rouaux *et al.*, Supplementary Figure 1

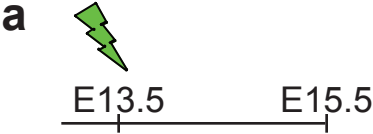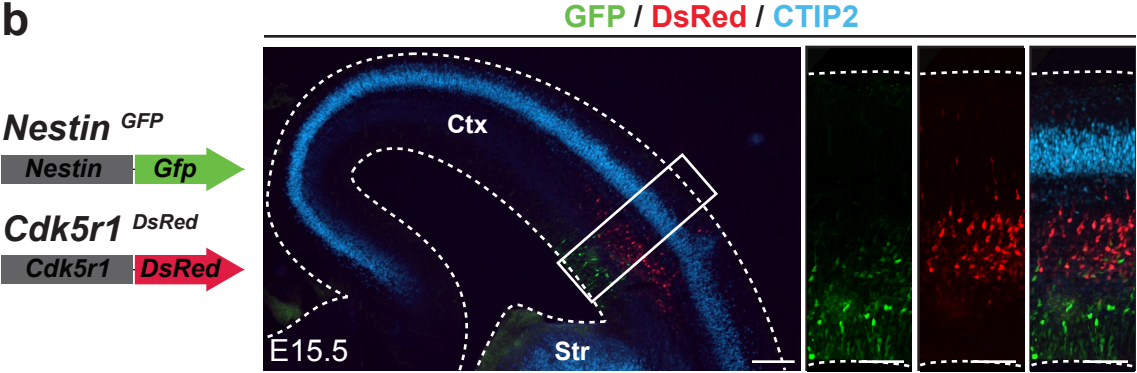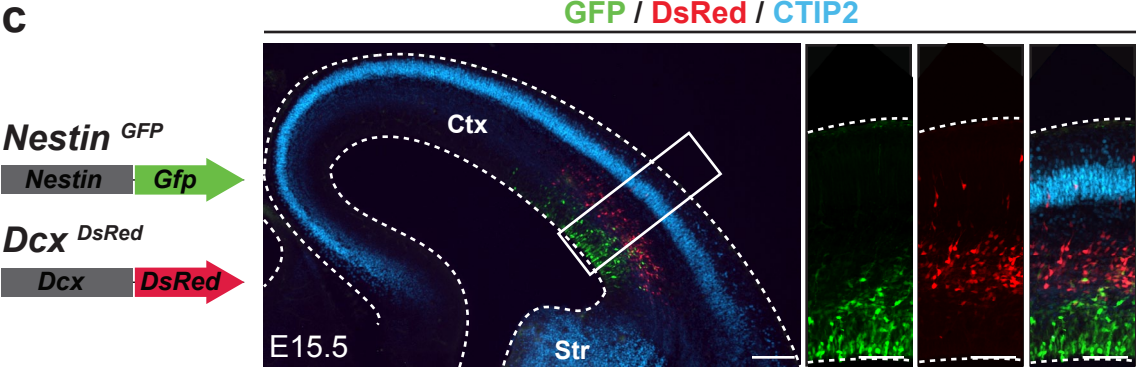

Rouaux *et al.*, Supplementary Figure 2

**a**

*Gfp* - Caspase3

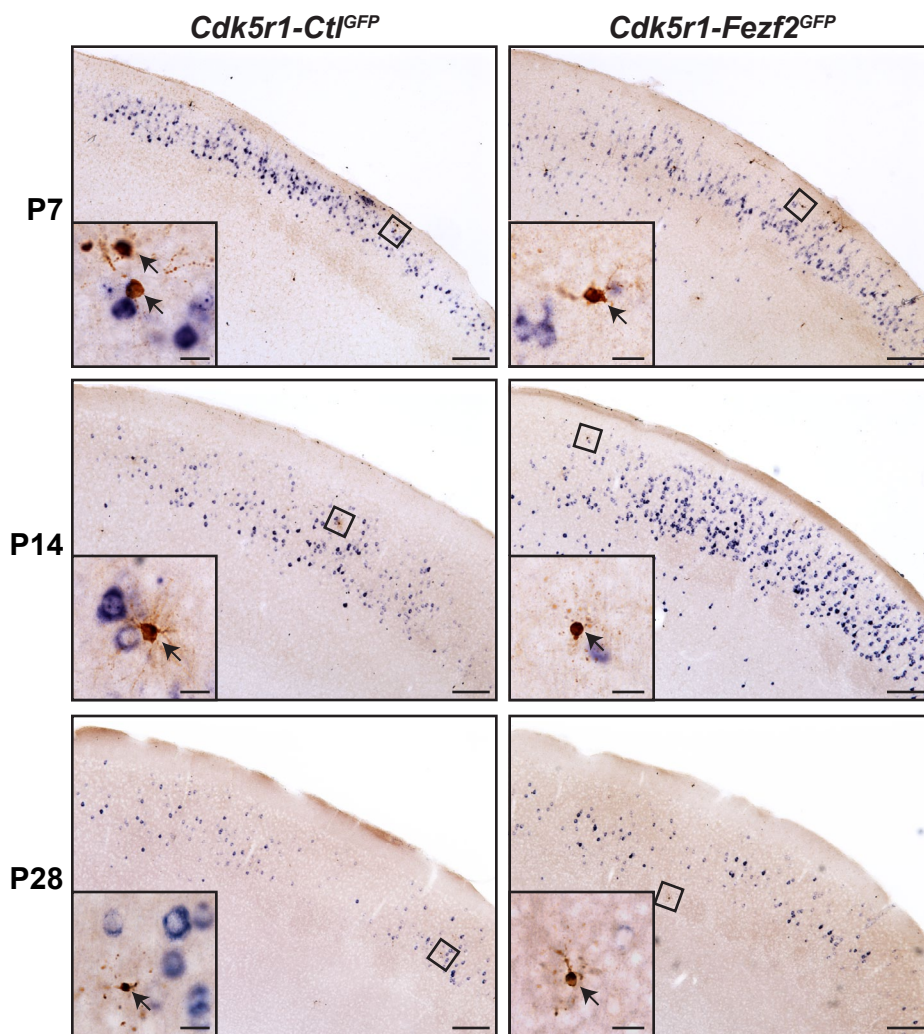

**b**

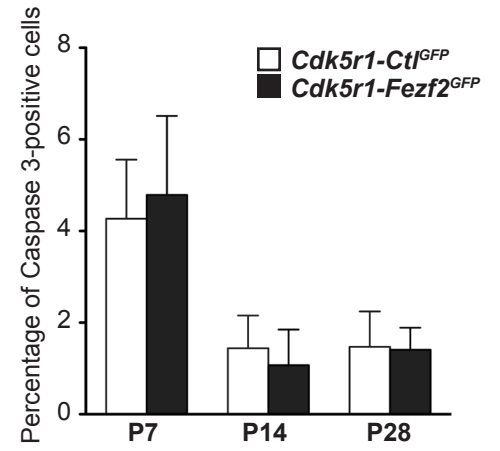

Rouaux *et al.*, Supplementary Figure 3

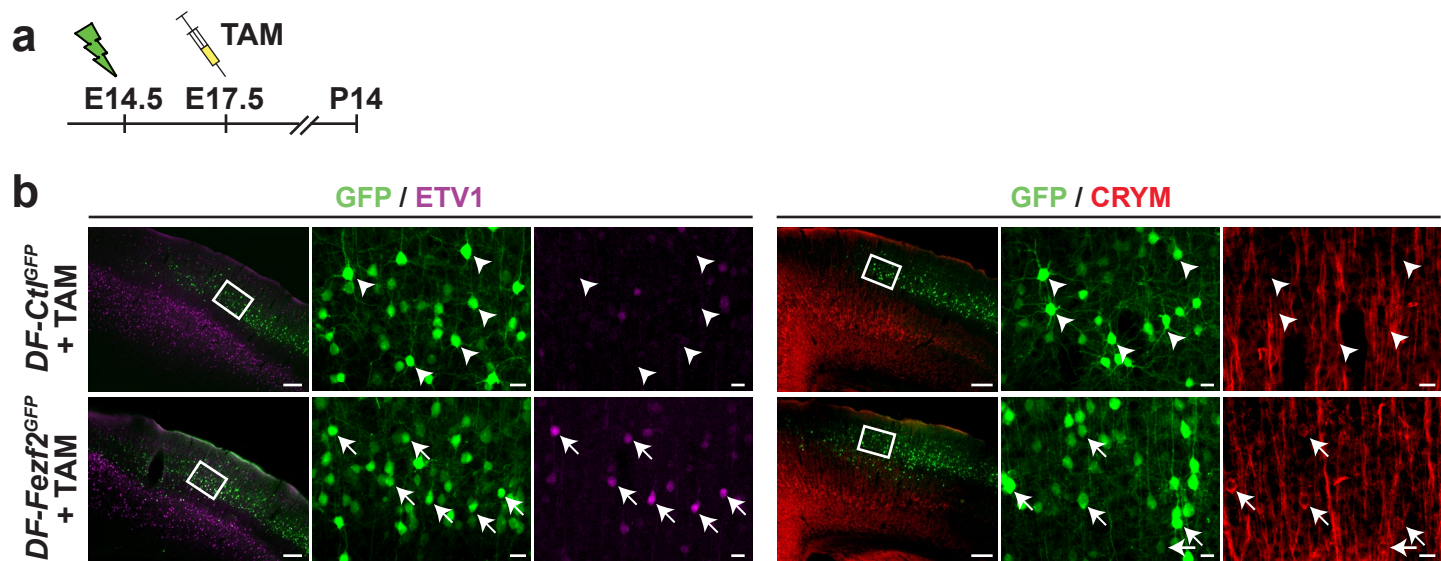

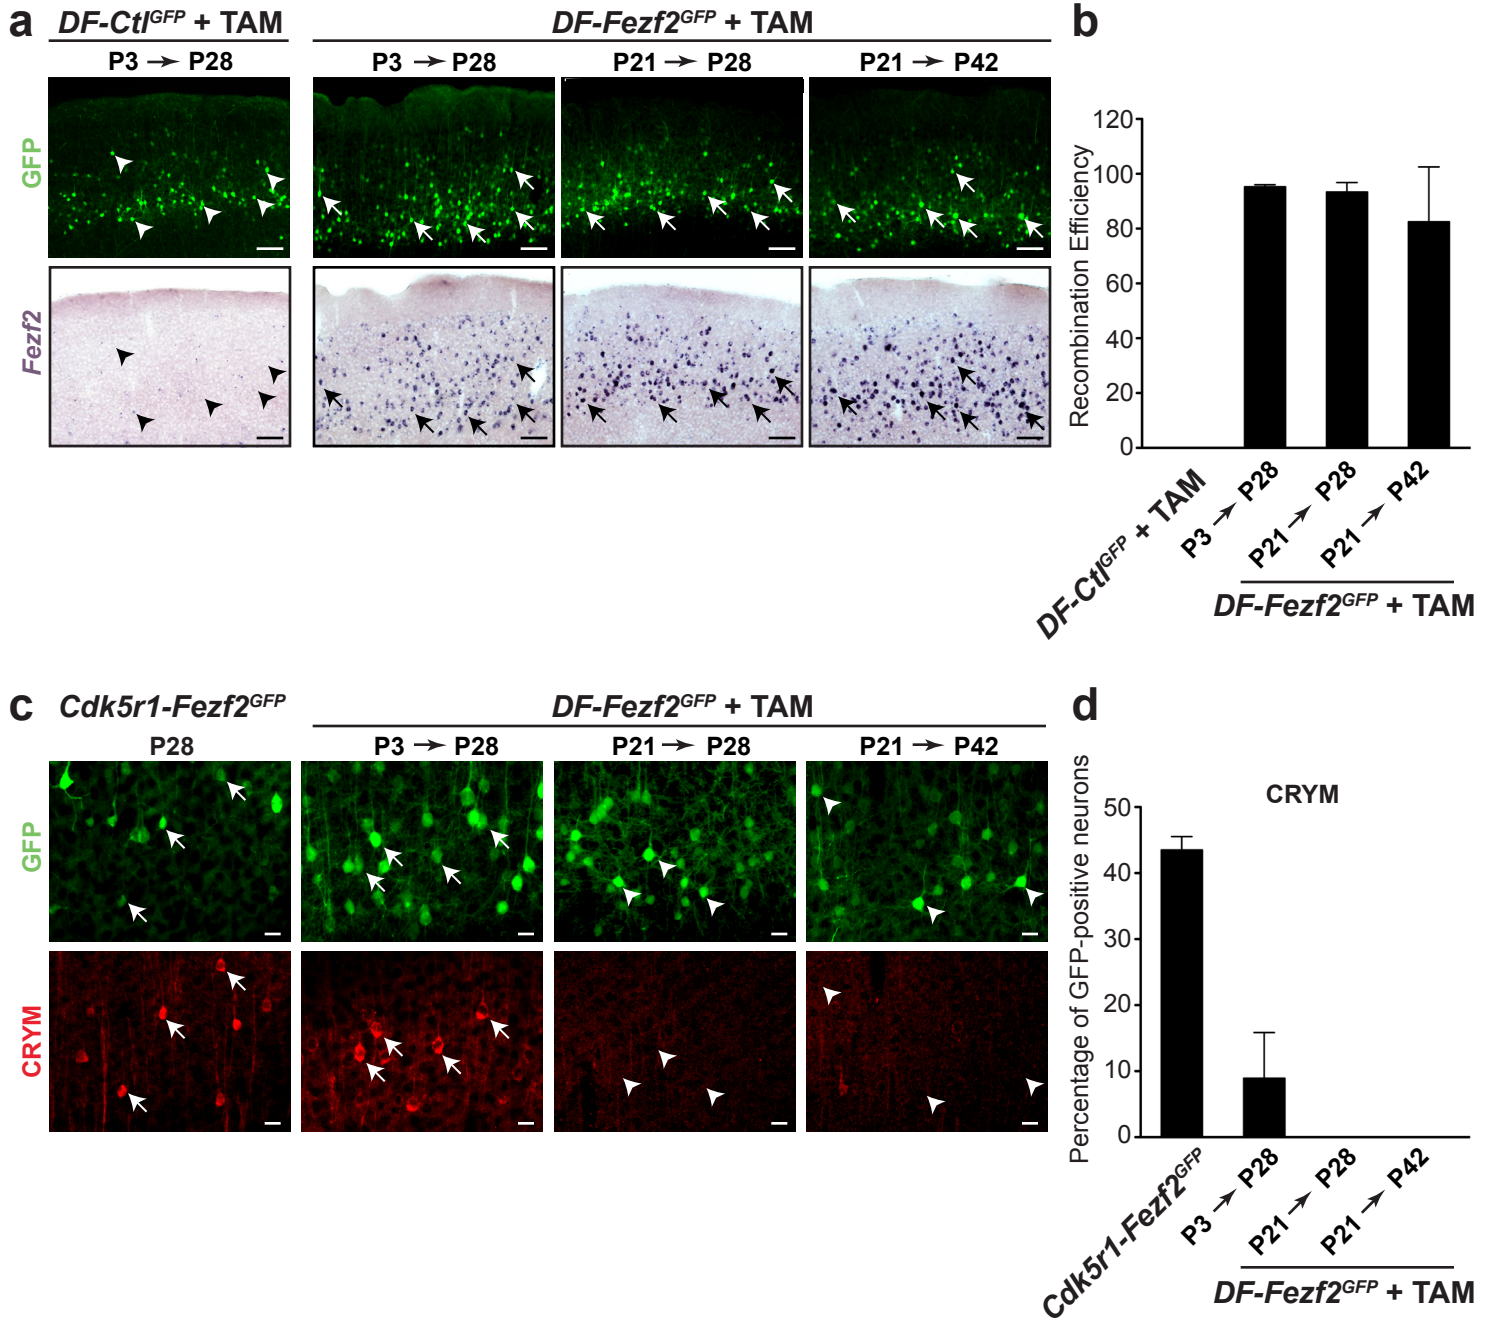

a

*Dcx-Ct1<sup>GFP</sup> - P7*

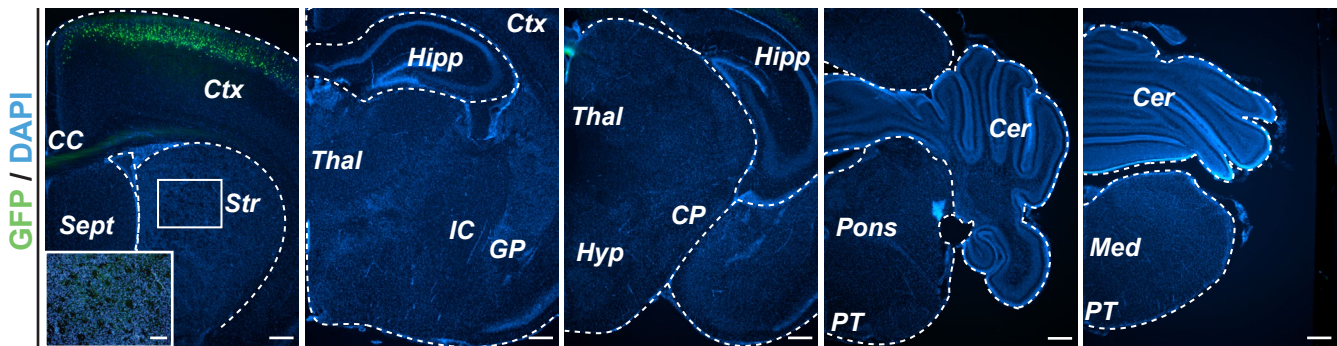

*Dcx-Fezf2<sup>GFP</sup> - P7*

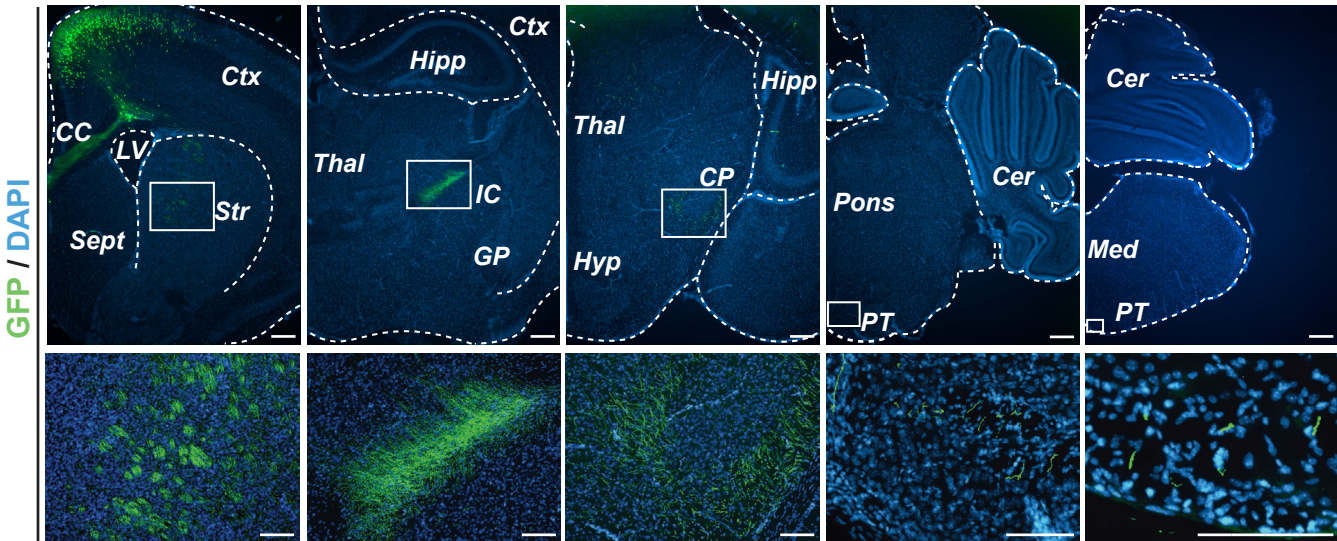

Supplement: NIHMS586092-supplement-SuppFIgs1to5.pdf [file NIHMS586092-supplement-SuppFIgs1to5.pdf]
